# Supplementary material for: Retrotransposon Proliferation Coincident with the Evolution of Dioecy in Asparagus
Source: PubMed Central journal article supplement (PMC5015926; doi:10.1534/g3.116.030239), 2016-06-23
Supplement: supp_g3.116.030239_TableS2.pdf [file supp_g3.116.030239_TableS2.pdf]

**Table S2: Number of paralogous and orthologous transcript pairs analyzed**

| Comparison                        | Pairs analyzed |
|-----------------------------------|----------------|
| A. officinalis x A. officinalis   | 225,035        |
| A. asparagoides x A. asparagoides | 11,818         |
| A. officinalis x A. asparagoides  | 326,687        |
