# Supplementary material for: Retrotransposon Proliferation Coincident with the Evolution of Dioecy in Asparagus
Source: PubMed Central journal article supplement (PMC5015926; doi:10.1534/g3.116.030239), 2016-06-23
Supplement: supp_g3.116.030239_TableS3.pdf [file supp_g3.116.030239_TableS3.pdf]

**Table S3: Estimated shotgun sequencing genome coverage**

| <b>Species</b>  | <b>Sequence data (nt)</b> | <b>Genome size (nt)</b> | <b>Estimated coverage</b> |
|-----------------|---------------------------|-------------------------|---------------------------|
| A. officinalis  | 7,955,329                 | 1,370,000,000           | 0.0058                    |
| A. maritimus    | 14,586,484                | 1,310,000,000           | 0.0111                    |
| A. aphyllus     | 13,805,190                | 1,250,000,000           | 0.0110                    |
| A. stipularis   | 9,569,792                 | 1,090,000,000           | 0.0089                    |
| A. falcatus     | 8,238,184                 | 1,060,000,000           | 0.0078                    |
| A. virgatus     | 13,374,059                | 830,000,000             | 0.0161                    |
| A. pyramidalis  | 16,872,384                | 720,000,000             | 0.0234                    |
| A. asparagoides | 12,304,847                | 2,400,000,000           | 0.0051                    |
